# Supplementary material
Source: Research Square preprint supplement (doi:10.21203/rs.3.rs-9668455/v1)
Supplement: Supplementary file 1 [file 5960d3007d94db1025507dd7.docx]

**Table S1** Proportion of missing data for covariates at baseline

| **Variable** | **(Total)** | **(**Frequency) | **(Miss,%)** |
| --- | --- | --- | --- |
| BMI | 8,407 | 7,391 | 1016 (12.09) |
| Alcohol drinking | 8,407 | 8,404 | 3 (0.04) |
| Diabetes | 8,407 | 8,317 | 90 (1.07) |
| Hypertension | 8,407 | 8,361 | 46 (0.55) |
| Heart disease | 8,407 | 8,361 | 46 (0.55) |
| Stroke | 8,407 | 8,380 | 27 (0.32) |
| Cancer | 8,407 | 8,365 | 42 (0.50) |
| Arthritis | 8,407 | 8,388 | 19 (0.23) |
| Age | 8,407 | 8,407 | 0 (0.00) |
| Education | 8,407 | 8,407 | 0 (0.00) |
| Marital status | 8,407 | 8,407 | 0 (0.00) |
| Smoking status | 8,407 | 8,407 | 0 (0.00) |
| Residence | 8,407 | 8,407 | 0 (0.00) |
| Region | 8,407 | 8,407 | 0 (0.00) |

**Table S2** Baseline characteristics of participants by hip fracture status during follow-up (0 = without hip fracture, 1 = with hip fracture)

| **Variables** | **Total (n = 8,407)** | **0 (n = 8,034)** | **1 (n = 373)** | ***P*** |
| --- | --- | --- | --- | --- |
|
| **Age, years, mean±SD** | 58.05 ± 8.51 | 57.92 ± 8.43 | 61.03 ± 9.61 | <.001 |
| **BMI,kg/m2, mean±SD** | 23.51 ± 3.69 | 23.52 ± 3.67 | 23.25 ± 4.15 | 0.159 |
| **Sex** |  |  |  | 0.341 |
| Female | 4,667 (55.51) | 4,451 (55.40) | 216 (57.91) |  |
| Male | 3,740 (44.49) | 3,583 (44.60) | 157 (42.09) |  |
| **Education** |  |  |  | <.001 |
| Preschool education | 4,161 (49.49) | 3,926 (48.87) | 235 (63.00) |  |
| Primary education | 1,767 (21.02) | 1,697 (21.12) | 70 (18.77) |  |
| Secondary education | 1,604 (19.08) | 1,559 (19.41) | 45 (12.06) |  |
| Higher education | 875 (10.41) | 852 (10.60) | 23 (6.17) |  |
| **Marital status** |  |  |  | <.001 |
| NO | 833 (9.91) | 773 (9.62) | 60 (16.09) |  |
| Yes | 7,574 (90.09) | 7,261 (90.38) | 313 (83.91) |  |
| **Smoking status** |  |  |  | 0.595 |
| NO | 5,300 (63.04) | 5,060 (62.98) | 240 (64.34) |  |
| Yes | 3,107 (36.96) | 2,974 (37.02) | 133 (35.66) |  |
| **Alcohol drinking** |  |  |  | 0.494 |
| NO | 5,235 (62.27) | 5,009 (62.35) | 226 (60.59) |  |
| Yes | 3,172 (37.73) | 3,025 (37.65) | 147 (39.41) |  |
| **Residence** |  |  |  | <.001 |
| Urban | 2,899 (34.48) | 2,802 (34.88) | 97 (26.01) |  |
| Rural | 5,508 (65.52) | 5,232 (65.12) | 276 (73.99) |  |
| **Region, n (%)** |  |  |  | 0.098 |
| Eastern | 3,760 (44.72) | 3,601 (44.82) | 159 (42.63) |  |
| Central | 1,413 (16.81) | 1,349 (16.79) | 64 (17.16) |  |
| Western | 2,713 (32.27) | 2,577 (32.08) | 136 (36.46) |  |
| Northeastern | 521 (6.20) | 507 (6.31) | 14 (3.75) |  |
| **Diabetes** |  |  |  | 0.791 |
| NO | 7,937 (94.41) | 7,586 (94.42) | 351 (94.10) |  |
| Yes | 470 (5.59) | 448 (5.58) | 22 (5.90) |  |
| **Hypertension** |  |  |  | 0.228 |
| NO | 6,242 (74.25) | 5,975 (74.37) | 267 (71.58) |  |
| Yes | 2,165 (25.75) | 2,059 (25.63) | 106 (28.42) |  |
| **Heart disease** |  |  |  | 0.050 |
| NO | 7,454 (88.66) | 7,135 (88.81) | 319 (85.52) |  |
| Yes | 953 (11.34) | 899 (11.19) | 54 (14.48) |  |
| **Stroke** |  |  |  | 0.002 |
| NO | 8,234 (97.94) | 7,877 (98.05) | 357 (95.71) |  |
| Yes | 173 (2.06) | 157 (1.95) | 16 (4.29) |  |
| **Cancer** |  |  |  | 1.000 |
| NO | 8,338 (99.18) | 7,968 (99.18) | 370 (99.20) |  |
| Yes | 69 (0.82) | 66 (0.82) | 3 (0.80) |  |
| **Arthritis** |  |  |  | <.001 |
| NO | 5,461 (64.96) | 5,263 (65.51) | 198 (53.08) |  |
| Yes | 2,946 (35.04) | 2,771 (34.49) | 175 (46.92) |  |

**Table S3** Multicollinearity assessment using the generalized variance inflation factor (GVIF) for variables in the Cox model with **TC/HDL-C** as a continuous variable

| **Variable** | **GVIF** | **Df** | **GVIF^(1/(2×Df))** |
| --- | --- | --- | --- |
| TC/HDL-C | 1.092 | 1 | 1.045 |
| Age | 1.235 | 1 | 1.111 |
| BMI | 1.244 | 1 | 1.115 |
| Sex | 2.399 | 1 | 1.549 |
| Education | 1.349 | 3 | 1.051 |
| Marital status | 1.088 | 1 | 1.043 |
| Smoking status | 2.023 | 1 | 1.422 |
| Alcohol drinking | 1.427 | 1 | 1.195 |
| Residence | 1.09 | 1 | 1.044 |
| Region | 1.084 | 3 | 1.014 |
| Diabetes | 1.044 | 1 | 1.022 |
| Hypertension | 1.17 | 1 | 1.082 |
| Heart disease | 1.088 | 1 | 1.043 |
| Stroke | 1.021 | 1 | 1.011 |
| Cancer | 1.005 | 1 | 1.003 |
| Arthritis | 1.067 | 1 | 1.033 |

**Table S4** Multicollinearity assessment using the generalized variance inflation factor (GVIF) for variables in the Cox model with ****TC/HDL-C**** categorized into quartiles

| **Variable** | **GVIF** | **Df** | **GVIF^(1/(2×Df))** |
| --- | --- | --- | --- |
| TC/HDL-C(quartiles) | 1.134 | 3 | 1.021 |
| Age | 1.236 | 1 | 1.112 |
| BMI | 1.266 | 1 | 1.125 |
| Sex | 2.401 | 1 | 1.550 |
| Education | 1.351 | 3 | 1.051 |
| Marital status | 1.088 | 1 | 1.043 |
| Smoking status | 2.023 | 1 | 1.422 |
| Alcohol drinking | 1.431 | 1 | 1.196 |
| Residence | 1.091 | 1 | 1.045 |
| Region | 1.085 | 3 | 1.014 |
| Diabetes | 1.044 | 1 | 1.022 |
| Hypertension | 1.171 | 1 | 1.082 |
| Heart disease | 1.089 | 1 | 1.044 |
| Stroke | 1.022 | 1 | 1.011 |
| Cancer | 1.006 | 1 | 1.003 |
| Arthritis | 1.067 | 1 | 1.033 |

**Table S5** Test of proportional hazards assumption using Schoenfeld residuals for the Cox model with TC/HDL-C as a continuous variable

| **Variable** | **χ²** | **df** | ***p*** |
| --- | --- | --- | --- |
| TC/HDL-C | 0.54841 | 1 | 0.4590 |
| Age | 10.25978 | 1 | 0.0014 |
| BMI | 3.52719 | 1 | 0.0604 |
| Sex | 0.53232 | 1 | 0.4656 |
| Education | 1.21978 | 3 | 0.7483 |
| Marital status | 0.96528 | 1 | 0.3259 |
| Smoking status | 0.11257 | 1 | 0.7372 |
| Alcohol drinking | 0.17204 | 1 | 0.6783 |
| Residence | 6.63014 | 1 | 0.0100 |
| Region | 3.22961 | 3 | 0.3576 |
| Diabetes | 3.02344 | 1 | 0.0821 |
| Hypertension | 0.80684 | 1 | 0.3691 |
| Heart disease | 0.07625 | 1 | 0.7824 |
| Stroke | 0.55377 | 1 | 0.4568 |
| Cancer | 0.00255 | 1 | 0.9597 |
| Arthritis | 0.43825 | 1 | 0.5080 |
| Global test | 31.13723 | 20 | 0.0534 |

**Table S6** Test of proportional hazards assumption using Schoenfeld residuals for the Cox model with TC/HDL-C categorized into quartiles

| **Variable** | **χ²** | **df** | ***p*** |
| --- | --- | --- | --- |
| TC/HDL-C(quartiles) | 1.51581 | 3 | 0.6786 |
| Age | 10.18565 | 1 | 0.0014 |
| BMI | 3.48612 | 1 | 0.0619 |
| Sex | 0.51819 | 1 | 0.4716 |
| Education | 1.22959 | 3 | 0.7459 |
| Marital status | 0.9345 | 1 | 0.3337 |
| Smoking status | 0.12011 | 1 | 0.7289 |
| Alcohol drinking | 0.17216 | 1 | 0.6782 |
| Residence | 6.6389 | 1 | 0.0100 |
| Region | 3.25622 | 3 | 0.3538 |
| Diabetes | 3.00918 | 1 | 0.0828 |
| Hypertension | 0.7916 | 1 | 0.3736 |
| Heart disease | 0.08365 | 1 | 0.7724 |
| Stroke | 0.56256 | 1 | 0.4532 |
| Cancer | 0.00161 | 1 | 0.9680 |
| Arthritis | 0.43998 | 1 | 0.5100 |
| Global test | 30.70074 | 22 | 0.1024 |

**Table S7** Sensitivity analysis of the association between TC/HDL-C and hip fracture risk using complete-case analysis (without multiple imputation)

| **Variables** | **Model 1** | | **Model 2** | | **Model 3** | |
| --- | --- | --- | --- | --- | --- | --- |
| **HR (95%CI)** | ***P*** | **HR (95%CI)** | ***P*** | **HR (95%CI)** | ***P*** |
| TC/HDL-C  (quartiles) |  |  |  |  |  |  |
| Q1 | 1.00 (Reference) |  | 1.00 (Reference) |  | 1.00 (Reference) |  |
| Q2 | 0.74 (0.55 -0.98) | 0.037 | 0.75 (0.57 -1.00) | 0.052 | 0.74 (0.54 -1.01) | 0.059 |
| Q3 | 0.97 (0.74 -1.27) | 0.834 | 0.99 (0.76 -1.29) | 0.947 | 1.04 (0.77 -1.40) | 0.796 |
| Q4 | 0.67 (0.50 -0.90) | 0.008 | 0.68 (0.51 -0.92) | 0.011 | 0.70 (0.50 -0.99) | 0.045 |

**Model 1: Crude model.**

**Model 2: Adjusted for age, sex, smoking status, and alcohol drinking.**

**Model 3: Further adjusted for age, BMI, sex, education, marital status, smoking status, alcohol drinking, residence, region, diabetes, hypertension, heart disease, stroke, cancer, and arthritis.**
